# Supplementary material
Source: bioRxiv or medRxiv preprint supplement (https://www.biorxiv.org/highwire/filestream/105990/field_highwire_adjunct_files/0/348730-1.pdf)

Supplemental Fig. 1 Lipidation efficiency at different concentrations of GABARAP family proteins

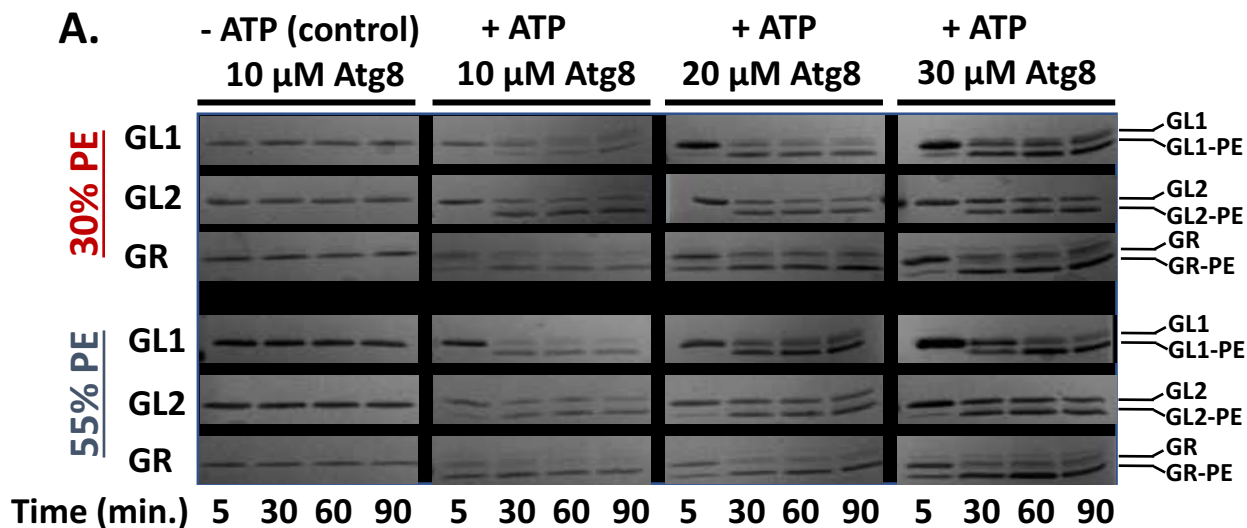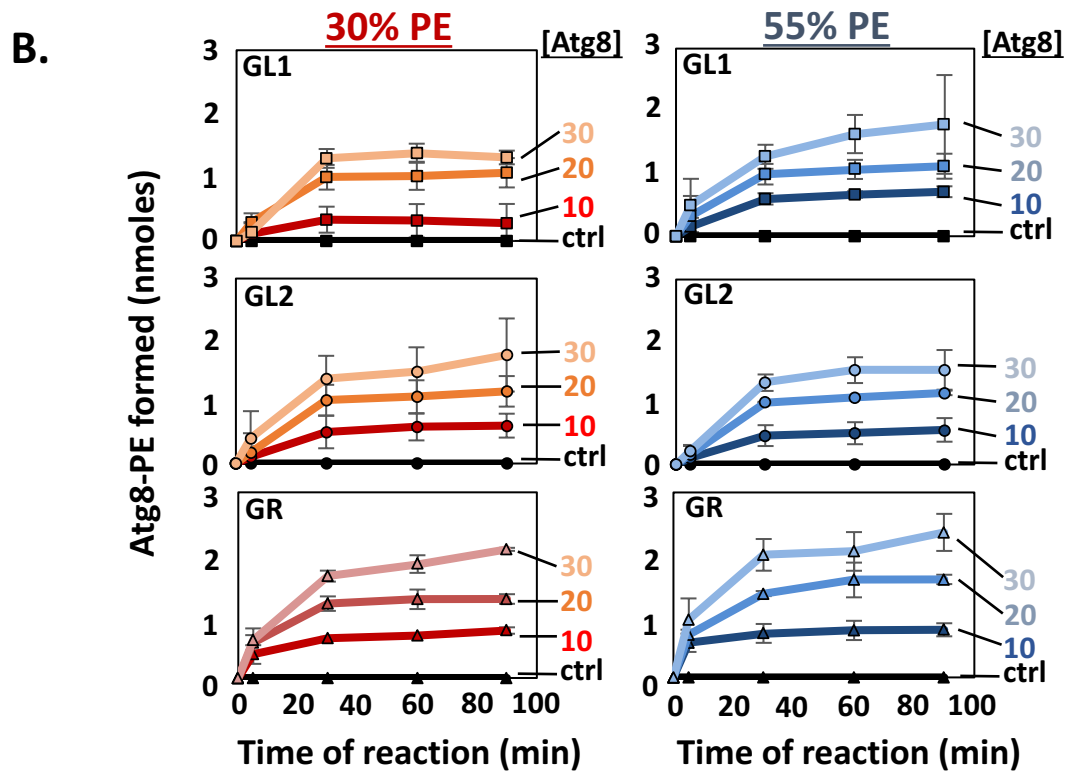

Supplemental Fig. 2 High concentrations of soluble (non-lipidated) GR do not lead to tethering

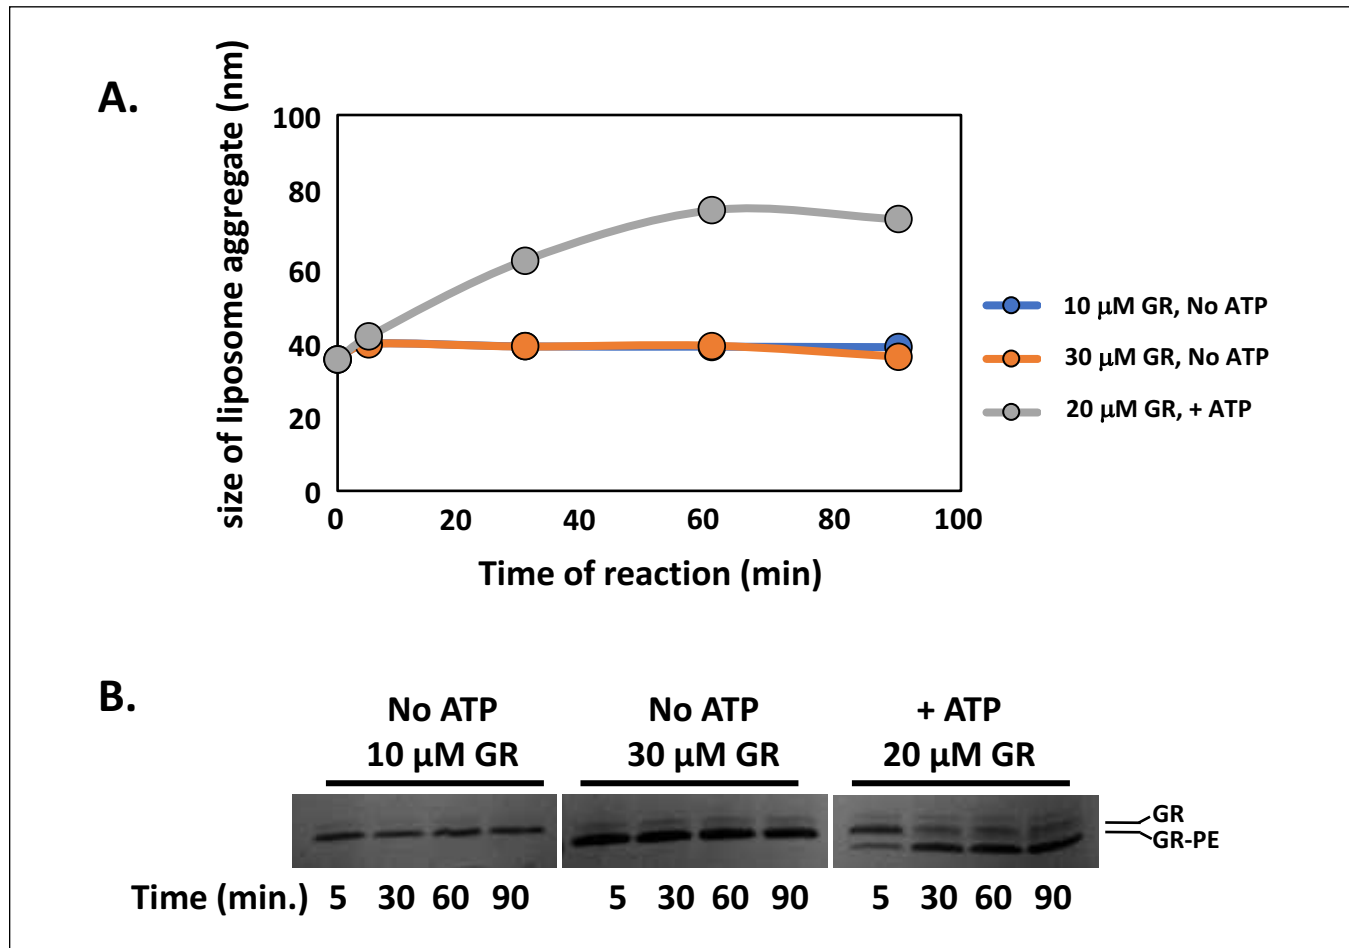

Supplemental Fig 3 Mammalian Atg8 proteins do not drive lipid-mixing on 30% PE liposomes.

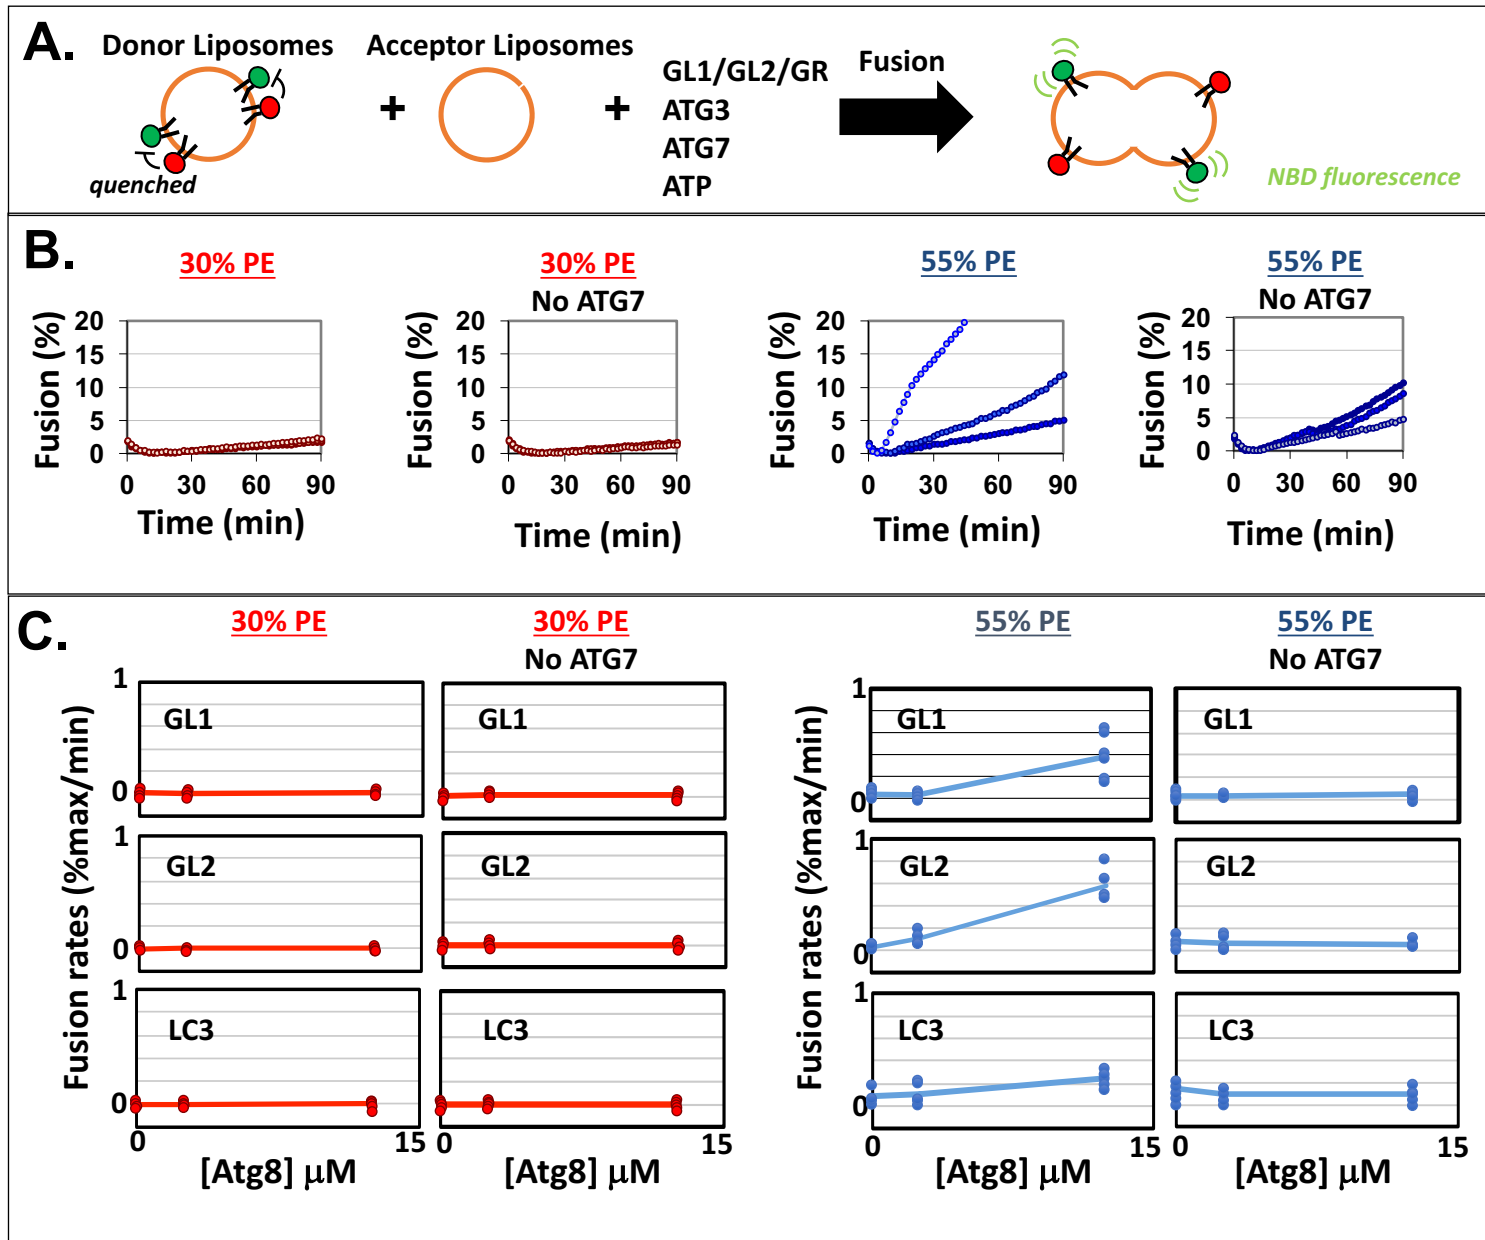

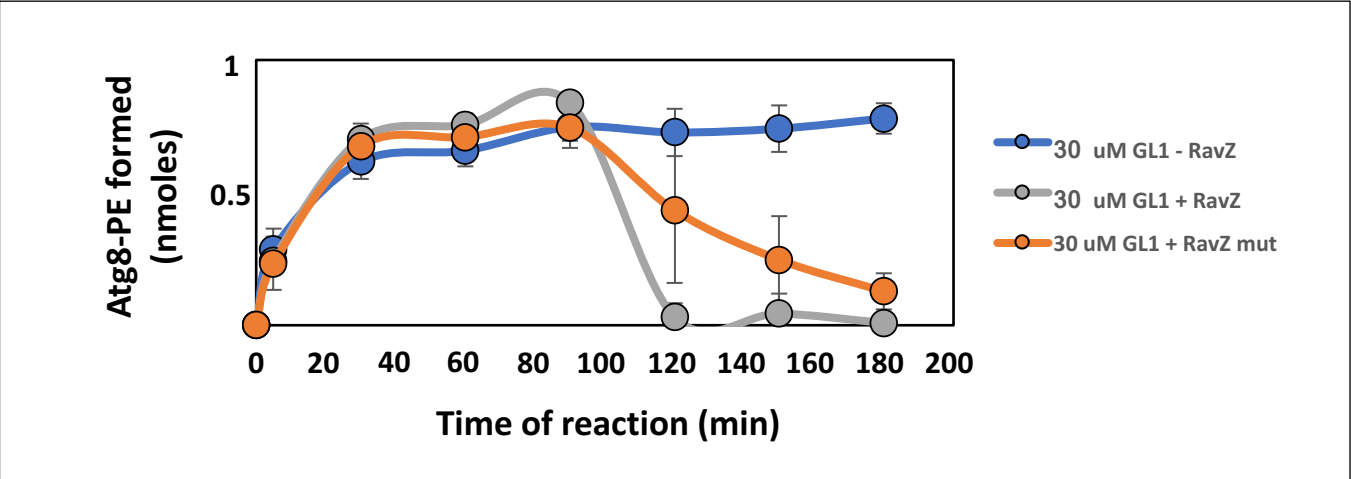

Supplemental Fig. 5 Single molecule bleaching confirms Alexa488-GL1-PE is not in large complexes.

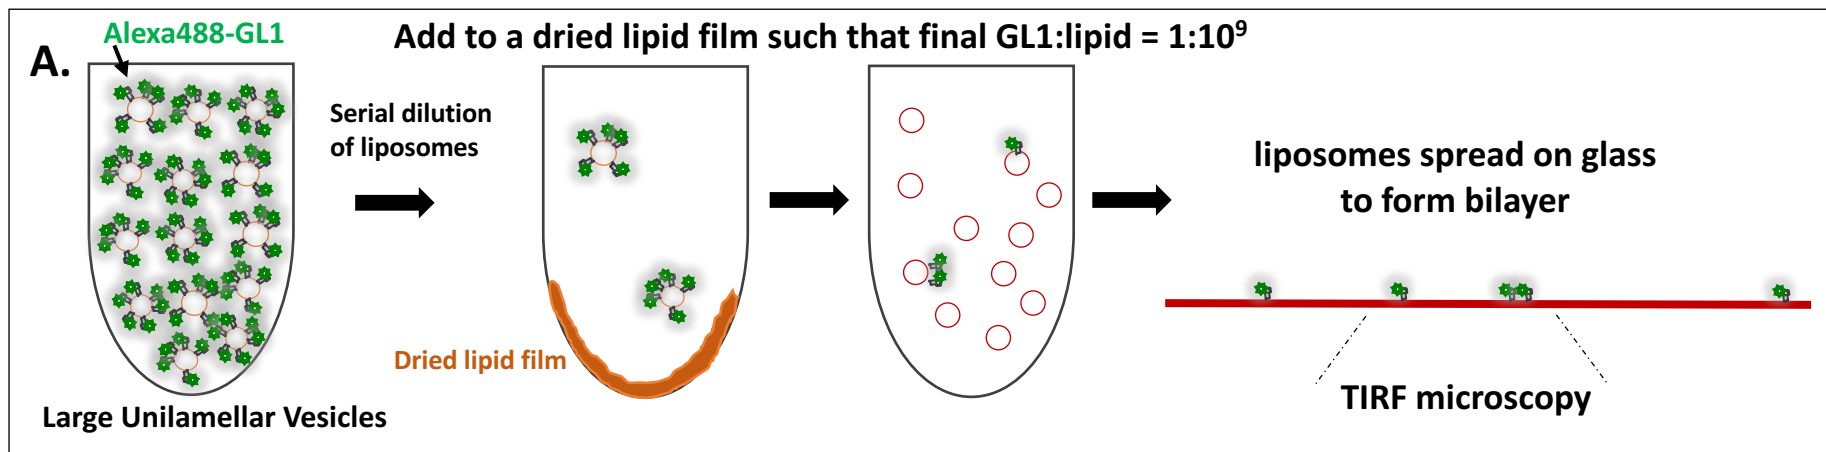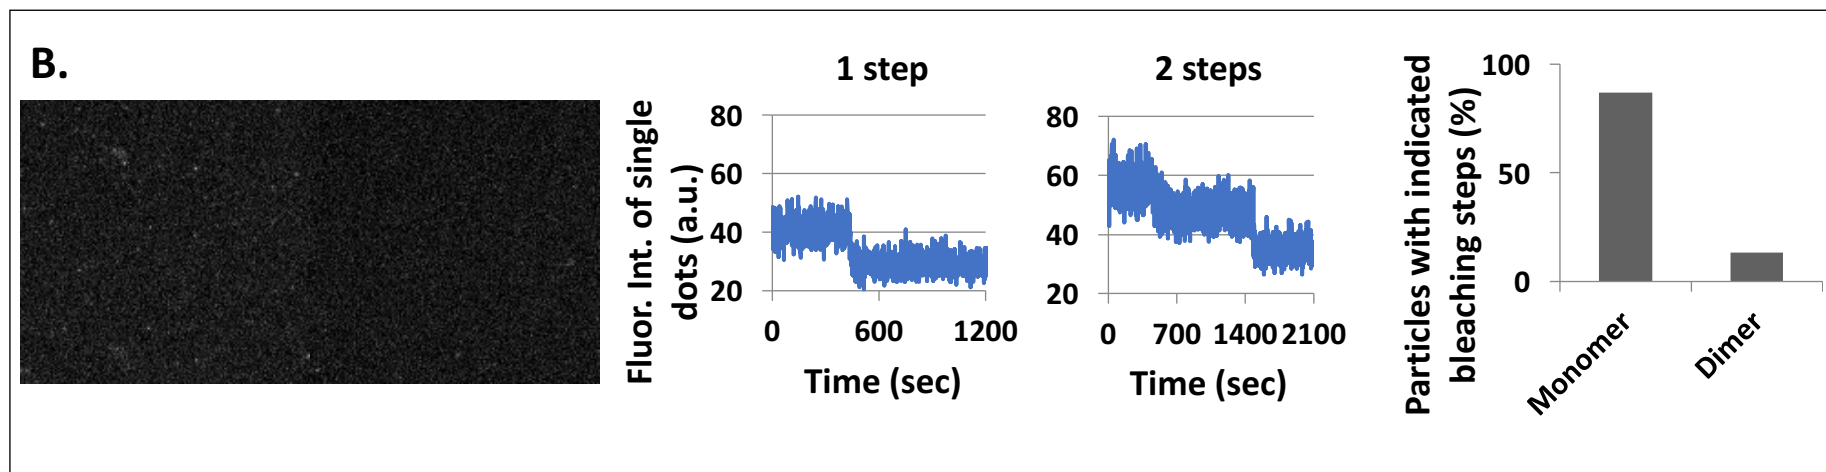

Supplement: Supplementary file [file 348730-1.pdf]
